# Supplementary material for: MicroRNAs sequencing unveils distinct molecular subgroups of plasmablastic lymphoma
Source: PubMed Central journal article supplement (PMC5746073; doi:10.18632/oncotarget.22219), 2017-10-31
Supplement: oncotarget-08-107356-s001.pdf [file oncotarget-08-107356-s001.pdf]

# MicroRNAs sequencing unveils distinct molecular subgroups of plasmablastic lymphoma

## SUPPLEMENTARY MATERIALS

For Supplementary Tables see in Supplementary Files

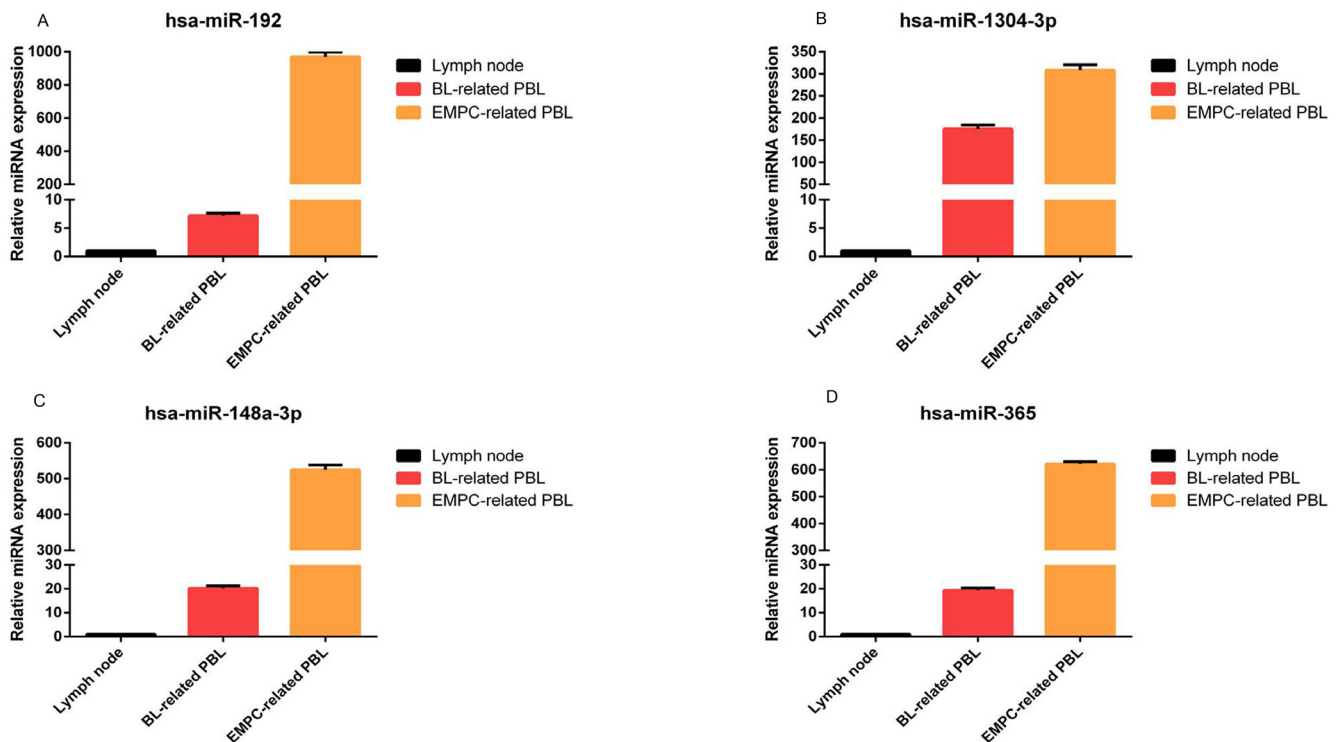

**Supplementary Figure 1:** Differential expression of hsa-miR-192-5p (A), hsa-miR-1304-3p (B), hsa-miR-148a-3p (C) and hsa-miR-365-3p (D) expression in BL-related versus EMPC-related PBLs validation group. Values are expressed as mean  $\pm$  standard deviation (ST). Statistical significance was determined with Student's unpaired t-test ( $p < 0.005$ ).

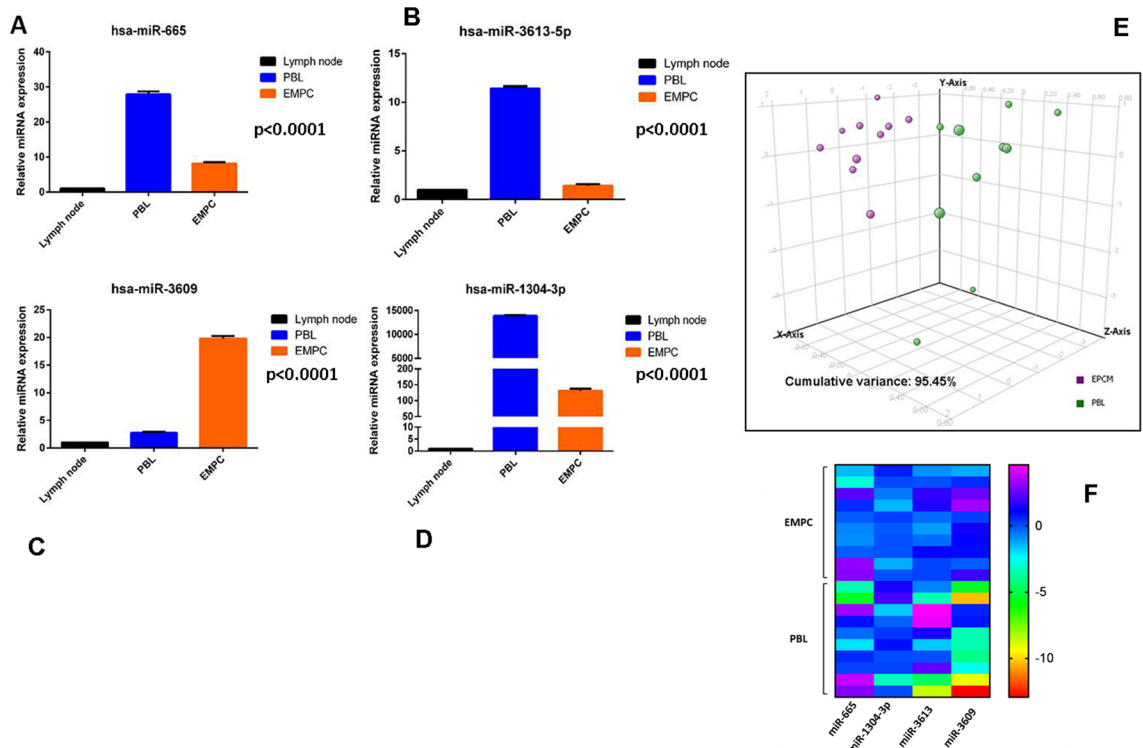

**Supplementary Figure 2: hsa-miR-3613-5p, hsa-miR-1304-3p and hsa-miR-3609 expression in PBL versus EMPC validation cohort by using RT-qPCR (A).** Values are expressed as mean  $\pm$  standard deviation (ST). Statistical significance was determined with Student's unpaired t-test ( $p < 0.005$ ). Principal component analysis indicated that based on the expression of as few as 4 miRNAs (A-D), an independent set of cases was correctly classified as PBL or EPCM, the two entities being clearly distinct (E). Based on the expression of such miRNA, cases were then clustered (F)

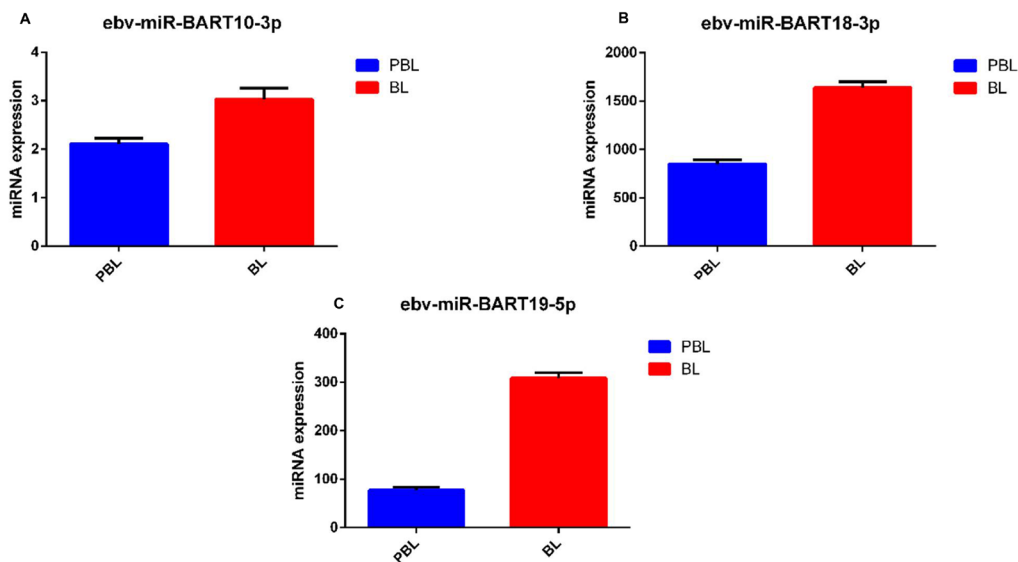

**Supplementary Figure 3: EBV-viral miRNAs (EBV-miR-Bart10-3p (A), EBV-miR-18-3p (B), EBV-miR-19-5p (C)) expression in PBL versus BL validation sets by using RT-qPCR.** Values are expressed as mean  $\pm$  standard deviation (ST). Statistical significance was determined with Student's unpaired t-test ( $p < 0.005$ ).
